# Supplementary material for: Activation of RAS Signalling is Associated with Altered Cell Adhesion in Phaeochromocytoma
Source: PubMed Central journal article supplement (PMC7663737; doi:10.3390/ijms21218072), 2020-10-29
Supplement: ijms-21-08072-s001.pdf [file ijms-21-08072-s001.pdf]

**Supplementary Information for “Activation of RAS Signalling is Associated with Altered Cell Adhesion in Phaeochromocytoma” by Hugo M. Rossitti, Ravi Kumar Dutta, Catharina Larsson, Hans K. Ghayee, Peter Söderkvist, and Oliver Gimm.**

---

**Supplementary Figures**

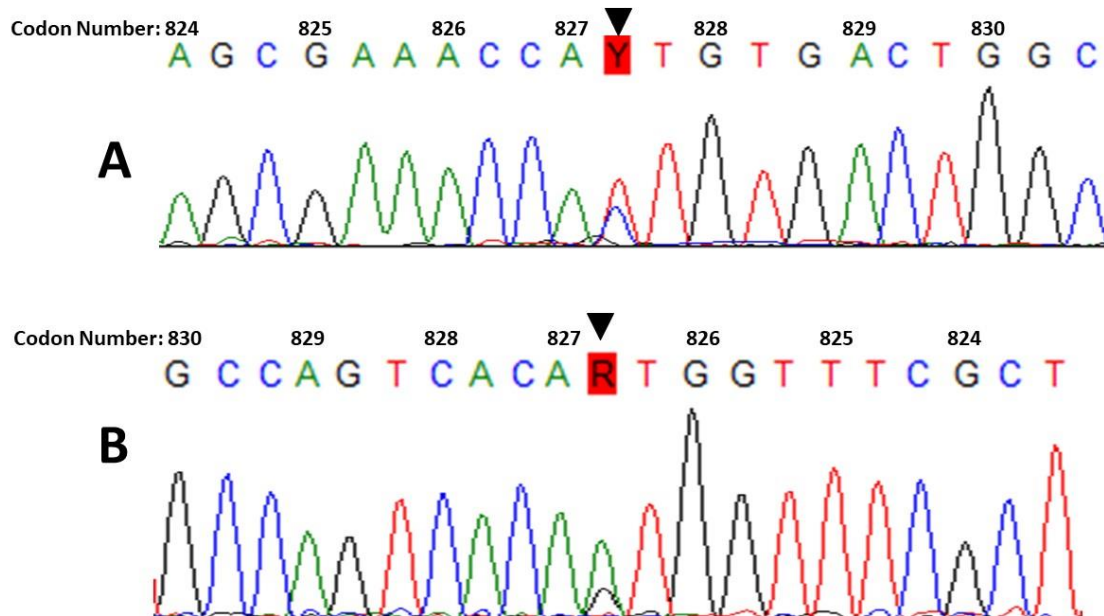

**Supplementary Figure S1: Confirmation of KIF1B T827I mutation in hPheo1 cell line through Sanger sequencing. KIF1B cDNA sequence trace corresponding to codons 824-830 from hPheo1 cells with forward (coding sequence, **A**) and reverse primers (complement, **B**).**

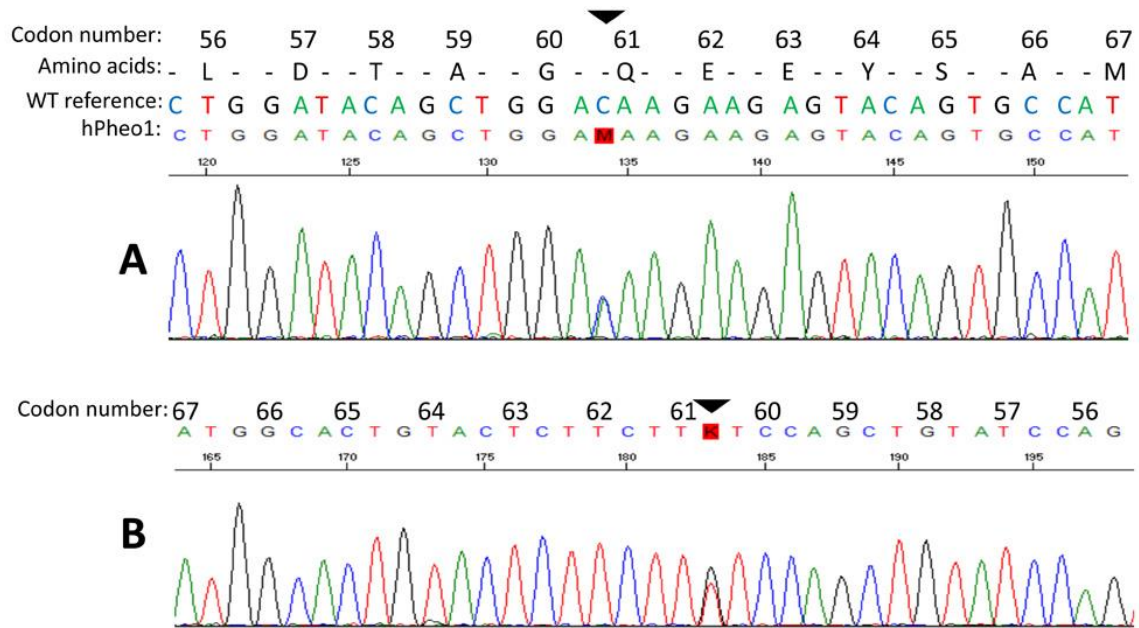

**Supplementary Figure S2: Confirmation of NRAS Q61K mutation in hPheo1 cell line through Sanger sequencing.** NRAS cDNA sequence trace corresponding to codons 56-67 from hPheo1 cells with forward (coding sequence, **A**) and reverse primers (complement, **B**).

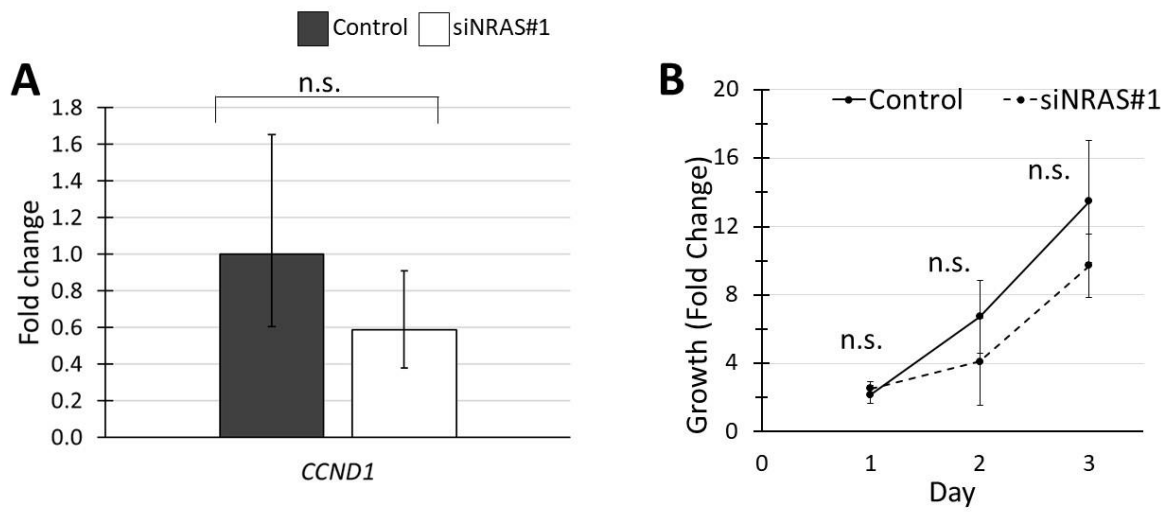

**Supplementary Figure S3: *CCND1* gene expression and *hPheo1* proliferation.** **A:** Expression of *CCND1* mRNA assessed by RT-qPCR and presented as fold change ( $2^{-\Delta\Delta CT}$ , mean  $\pm$  standard error of the mean). **B:** Cell counts at 1, 2, and 3 days after plating (corresponding to 72, 96 and 120 hours posttransfection, respectively) of control- or siNRAS#1-transfected hPheo1 cells expressed as fold change of the number of cells plated at day 0 (48 hours posttransfection; mean  $\pm$  standard deviation). All results are from three independent siRNA experiments.

## Supplementary Tables

**Supplementary Table S1: List of transcript cluster IDs significantly upregulated in hPheo1 by siNRAS treatment** (comparison: siNRAS versus control-transfected hPheo1; ANOVA  $p < 0.05$ , FDR  $< 0.25$ , fold change  $< -1.5$  or  $> 1.5$ ).

| Transcript Cluster ID | siRNA Average Signal (log2) | Control Average Signal (log2) | Fold Change | ANOVA p-value | FDR p-value | Gene Symbol    | Description                                                                                                       |
|-----------------------|-----------------------------|-------------------------------|-------------|---------------|-------------|----------------|-------------------------------------------------------------------------------------------------------------------|
| 8023995               | 5.6                         | 5.01                          | 1.51        | 0.001664      | 0.184761    | FSTL3          | follistatin-like 3 (secreted glycoprotein)                                                                        |
| 7964602               | 6.73                        | 6.13                          | 1.52        | 0.000493      | 0.093271    | LRIG3          | leucine-rich repeats and immunoglobulin-like domains 3                                                            |
| 8102831               | 4.29                        | 3.69                          | 1.52        | 0.001826      | 0.196069    | MGARP; NDUFC1  | mitochondria localized glutamic acid rich protein; NADH dehydrogenase (ubiquinone) 1, subcomplex unknown, 1, 6kDa |
| 8011193               | 5.11                        | 4.51                          | 1.52        | 0.000349      | 0.081128    | MIR22HG; MIR22 | MIR22 host gene; microRNA 22                                                                                      |
| 8175023               | 7.43                        | 6.82                          | 1.52        | 0.000050      | 0.025635    | ZDHHC9         | zinc finger, DHHC-type containing 9                                                                               |
| 8103415               | 3.55                        | 2.94                          | 1.53        | 0.000133      | 0.047180    | FAM198B        | family with sequence similarity 198, member B                                                                     |
| 7923453               | 7.73                        | 7.12                          | 1.53        | 0.001378      | 0.165671    | KDM5B          | lysine (K)-specific demethylase 5B                                                                                |
| 7915787               | 6.4                         | 5.78                          | 1.53        | 0.001383      | 0.165671    | PIK3R3         | phosphoinositide-3-kinase, regulatory subunit 3 (gamma)                                                           |
| 8094169               | 4.63                        | 4.02                          | 1.54        | 0.002276      | 0.227965    | CPEB2          | cytoplasmic polyadenylation element binding protein 2                                                             |
| 8113504               | 9.27                        | 8.65                          | 1.54        | 0.000847      | 0.124354    | NREP           | neuronal regeneration related protein                                                                             |
| 7980616               | 6.11                        | 5.49                          | 1.54        | 0.002649      | 0.248666    | PTPN21         | protein tyrosine phosphatase, non-receptor type 21                                                                |
| 7920057               | 3.52                        | 2.89                          | 1.54        | 0.000333      | 0.081128    | TDRKH          | tudor and KH domain containing                                                                                    |
| 7923378               | 10.2                        | 9.57                          | 1.55        | 0.000210      | 0.065264    | CSRP1          | cysteine and glycine-rich protein 1                                                                               |
| 8026971               | 8.72                        | 8.09                          | 1.55        | 0.001293      | 0.161346    | IFI30          | interferon, gamma-inducible protein 30                                                                            |

|         |       |      |      |          |          |                  |                                                                                                        |
|---------|-------|------|------|----------|----------|------------------|--------------------------------------------------------------------------------------------------------|
| 8138091 | 7.02  | 6.37 | 1.56 | 0.000643 | 0.110051 | DAGLB;<br>KDELR2 | diacylglycerol lipase, beta; KDEL (Lys-Asp-Glu-Leu) endoplasmic reticulum protein retention receptor 2 |
| 7934997 | 5.76  | 5.12 | 1.56 | 0.000229 | 0.066499 | PPP1R3C          | protein phosphatase 1, regulatory subunit 3C                                                           |
| 7912145 | 7.18  | 6.54 | 1.56 | 0.000472 | 0.092620 | TNFRSF9          | tumor necrosis factor receptor superfamily, member 9                                                   |
| 8008819 | 4.84  | 4.2  | 1.56 | 0.000357 | 0.081128 | YPEL2            | yippee like 2                                                                                          |
| 8058477 | 8.98  | 8.33 | 1.57 | 0.000945 | 0.129746 | KLF7             | Kruppel-like factor 7 (ubiquitous)                                                                     |
| 8041206 | 4.21  | 3.56 | 1.57 | 0.001014 | 0.137867 | LBH              | limb bud and heart development                                                                         |
| 7956856 | 5.86  | 5.21 | 1.57 | 0.000214 | 0.065575 | MSRB3            | methionine sulfoxide reductase B3                                                                      |
| 8150225 | 4.68  | 4.03 | 1.57 | 0.000144 | 0.049037 | RAB11FIP1        | RAB11 family interacting protein 1 (class I)                                                           |
| 7987892 | 7.42  | 6.78 | 1.57 | 0.000229 | 0.066499 | ZNF106           | zinc finger protein 106                                                                                |
| 7927732 | 7.23  | 6.57 | 1.58 | 0.000116 | 0.042733 | ARID5B           | AT rich interactive domain 5B (MRF1-like)                                                              |
| 8111772 | 7.67  | 7    | 1.59 | 0.000220 | 0.065907 | DAB2; C9         | Dab, mitogen-responsive phosphoprotein, homolog 2 (Drosophila); complement component 9                 |
| 8089544 | 6.19  | 5.5  | 1.61 | 0.000079 | 0.034155 | CCDC80           | coiled-coil domain containing 80                                                                       |
| 8078461 | 4.96  | 4.27 | 1.61 | 0.000730 | 0.115935 | FBXL2            | F-box and leucine-rich repeat protein 2                                                                |
| 8126018 | 7.04  | 6.36 | 1.61 | 0.000023 | 0.015824 | STK38            | serine/threonine kinase 38                                                                             |
| 8115397 | 5.67  | 4.98 | 1.62 | 0.000002 | 0.003708 | FAXDC2           | fatty acid hydroxylase domain containing 2                                                             |
| 8047078 | 4.92  | 4.21 | 1.64 | 0.000068 | 0.030938 | MFSD6            | major facilitator superfamily domain containing 6                                                      |
| 7918426 | 4.25  | 3.52 | 1.65 | 0.000114 | 0.042432 | SLC16A4          | solute carrier family 16, member 4                                                                     |
| 7984079 | 7.75  | 7.03 | 1.65 | 0.000356 | 0.081128 | TPM1             | tropomyosin 1 (alpha)                                                                                  |
| 8175256 | 5.52  | 4.79 | 1.66 | 0.001428 | 0.166863 | MIR503HG         | MIR503 host gene                                                                                       |
| 7956211 | 10.15 | 9.41 | 1.66 | 0.000002 | 0.003708 | MYL6;<br>MYL6B   | myosin light chain 6; myosin light chain 6B                                                            |

|         |      |      |      |          |          |                     |                                                                                                           |
|---------|------|------|------|----------|----------|---------------------|-----------------------------------------------------------------------------------------------------------|
| 8037537 | 6.94 | 6.2  | 1.67 | 0.000402 | 0.085958 | ERCC2               | excision repair cross-complementation group 2                                                             |
| 8156060 | 6.69 | 5.96 | 1.67 | 0.000094 | 0.038989 | TLE4                | transducin-like enhancer of split 4                                                                       |
| 8178884 | 6.02 | 5.27 | 1.69 | 0.001314 | 0.161346 | HLA-DMA;<br>HLA-DMB | major histocompatibility complex, class II, DM alpha; major histocompatibility complex, class II, DM beta |
| 8125537 | 6.16 | 5.4  | 1.69 | 0.002166 | 0.222582 | HLA-DMA;<br>HLA-DMB | major histocompatibility complex, class II, DM alpha; major histocompatibility complex, class II, DM beta |
| 8180086 | 6.02 | 5.27 | 1.69 | 0.001314 | 0.161346 | HLA-DMA;<br>HLA-DMB | major histocompatibility complex, class II, DM alpha; major histocompatibility complex, class II, DM beta |
| 7952268 | 9.51 | 8.76 | 1.69 | 0.000011 | 0.011903 | THY1                | Thy-1 cell surface antigen                                                                                |
| 8132710 | 3.44 | 2.68 | 1.7  | 0.000706 | 0.114075 | C7orf69             | chromosome 7 open reading frame 69                                                                        |
| 8098204 | 7.42 | 6.65 | 1.7  | 0.000105 | 0.041776 | CPE                 | carboxypeptidase E                                                                                        |
| 7971294 | 3.41 | 2.65 | 1.7  | 0.000476 | 0.092620 | FABP3P2             | fatty acid binding protein 3, pseudogene 2                                                                |
| 7943749 | 7    | 6.22 | 1.71 | 0.000096 | 0.039049 | LAYN                | layilin                                                                                                   |
| 7990839 | 4.9  | 4.12 | 1.71 | 0.000016 | 0.013804 | STARD5              | StAR-related lipid transfer domain containing 5                                                           |
| 7933821 | 5.48 | 4.7  | 1.72 | 0.000019 | 0.014465 | RHOBTB1             | Rho-related BTB domain containing 1                                                                       |
| 8090214 | 7.15 | 6.36 | 1.72 | 1.76E-08 | 0.000171 | SLC12A8             | solute carrier family 12, member 8                                                                        |
| 8127563 | 7.24 | 6.44 | 1.74 | 0.001390 | 0.165761 | COL12A1             | collagen, type XII, alpha 1                                                                               |
| 8155192 | 6.02 | 5.2  | 1.77 | 0.000024 | 0.015824 | GLIPR2              | GLI pathogenesis-related 2                                                                                |
| 8108697 | 4.03 | 3.2  | 1.78 | 0.001850 | 0.196554 | PCDHB5              | protocadherin beta 5                                                                                      |
| 8151890 | 4.07 | 3.24 | 1.78 | 0.000144 | 0.049037 | TP53INP1            | tumor protein p53 inducible nuclear protein 1                                                             |

|         |       |      |      |          |          |                  |                                                                             |
|---------|-------|------|------|----------|----------|------------------|-----------------------------------------------------------------------------|
| 8155930 | 5.58  | 4.74 | 1.79 | 0.000795 | 0.121019 | GCNT1            | glucosaminyl (N-acetyl) transferase 1, core 2                               |
| 8127051 | 9.43  | 8.57 | 1.8  | 0.002729 | 0.249682 | TRAM2            | translocation associated membrane protein 2                                 |
| 8117054 | 8.21  | 7.35 | 1.81 | 0.000014 | 0.012827 | CAP2             | CAP, adenylate cyclase-associated protein, 2 (yeast)                        |
| 8112731 | 8.76  | 7.89 | 1.83 | 0.000455 | 0.091250 | F2RL2            | coagulation factor II (thrombin) receptor-like 2                            |
| 8097288 | 5.71  | 4.83 | 1.83 | 0.000877 | 0.125060 | FAT4             | FAT atypical cadherin 4                                                     |
| 8040473 | 6.51  | 5.64 | 1.84 | 0.000194 | 0.063311 | RHOB             | ras homolog family member B                                                 |
| 7933733 | 5.34  | 4.46 | 1.85 | 0.000335 | 0.081128 | FAM13C           | family with sequence similarity 13, member C                                |
| 7948630 | 7.77  | 6.88 | 1.86 | 0.000024 | 0.015824 | FADS3            | fatty acid desaturase 3                                                     |
| 8097829 | 4.19  | 3.29 | 1.86 | 0.000885 | 0.125060 | FHDC1            | FH2 domain containing 1                                                     |
| 8077499 | 3.15  | 2.26 | 1.86 | 0.001596 | 0.180006 | LINC00312; LMCD1 | long intergenic non-protein coding RNA 312; LIM and cysteine-rich domains 1 |
| 8052654 | 5.55  | 4.64 | 1.89 | 0.001112 | 0.147124 | PELI1            | pellino E3 ubiquitin protein ligase 1                                       |
| 8175263 | 4.2   | 3.27 | 1.9  | 0.000629 | 0.108288 | PLAC1            | placenta specific 1                                                         |
| 7921099 | 6.59  | 5.66 | 1.91 | 0.000184 | 0.060768 | CRABP2           | cellular retinoic acid binding protein 2                                    |
| 7925504 | 4.57  | 3.62 | 1.93 | 0.000597 | 0.105333 | MAP1LC3C         | microtubule associated protein 1 light chain 3 gamma                        |
| 8089835 | 9.14  | 8.18 | 1.94 | 4.78E-07 | 0.001420 | FSTL1; MIR198    | follistatin like 1; microRNA 198                                            |
| 7918323 | 6.28  | 5.32 | 1.94 | 0.000003 | 0.004239 | SORT1            | sortilin 1                                                                  |
| 8068083 | 6.32  | 5.35 | 1.95 | 3.05E-07 | 0.001111 | MAP3K7C L        | MAP3K7 C-terminal like                                                      |
| 8115327 | 10.79 | 9.81 | 1.97 | 0.000145 | 0.049037 | SPARC            | secreted protein, acidic, cysteine-rich (osteonectin)                       |
| 7970329 | 6.85  | 5.86 | 1.99 | 0.002423 | 0.238242 | GAS6             | growth arrest-specific 6                                                    |
| 8155754 | 6.56  | 5.57 | 1.99 | 0.000920 | 0.127413 | MAMDC2           | MAM domain containing 2                                                     |
| 8089112 | 5.55  | 4.55 | 2    | 5.37E-07 | 0.001420 | FILIP1L          | filamin A interacting protein 1-like                                        |

|         |      |      |      |          |          |           |                                                                   |
|---------|------|------|------|----------|----------|-----------|-------------------------------------------------------------------|
| 8117045 | 5.34 | 4.34 | 2.01 | 0.000241 | 0.067365 | RBM24     | RNA binding motif protein 24                                      |
| 7954065 | 5.99 | 4.96 | 2.04 | 0.000046 | 0.024237 | GPRC5A    | G protein-coupled receptor, class C, group 5, member A            |
| 7917347 | 7.65 | 6.61 | 2.05 | 0.000267 | 0.071720 | DDAH1     | dimethylarginine dimethylaminohydrolase 1                         |
| 7905428 | 5.82 | 4.79 | 2.05 | 1.45E-07 | 0.000844 | TUFT1     | tuftelin 1                                                        |
| 7973306 | 7.42 | 6.37 | 2.07 | 0.000469 | 0.092620 | ABHD4     | abhydrolase domain containing 4                                   |
| 7977854 | 6.98 | 5.93 | 2.07 | 0.000033 | 0.019437 | AJUBA     | ajuba LIM protein                                                 |
| 8141228 | 5.01 | 3.97 | 2.07 | 0.000434 | 0.089345 | TMEM130   | transmembrane protein 130                                         |
| 7942332 | 3.87 | 2.8  | 2.09 | 0.000042 | 0.023657 | FOLR1     | folate receptor 1 (adult)                                         |
| 7962375 | 4.85 | 3.77 | 2.1  | 0.000019 | 0.014465 | PRICKLE1  | prickle homolog 1                                                 |
| 8023528 | 4.25 | 3.17 | 2.11 | 0.000014 | 0.012790 | ALPK2     | alpha kinase 2                                                    |
| 7942793 | 4.71 | 3.61 | 2.14 | 0.000418 | 0.087505 | THRSP     | thyroid hormone responsive                                        |
| 8098263 | 7.65 | 6.53 | 2.18 | 0.001067 | 0.143101 | PALLD     | palladin, cytoskeletal associated protein                         |
| 7914557 | 6.07 | 4.88 | 2.28 | 0.000020 | 0.014765 | SYNC      | syncoilin, intermediate filament protein                          |
| 8123936 | 5.08 | 3.86 | 2.33 | 0.000031 | 0.018727 | NEDD9     | neural precursor cell expressed, developmentally down-regulated 9 |
| 7963333 | 5.97 | 4.75 | 2.34 | 0.000003 | 0.004787 | KRT80     | keratin 80, type II                                               |
| 7936050 | 4.21 | 2.95 | 2.41 | 0.000012 | 0.012215 | CYP17A1   | cytochrome P450, family 17, subfamily A, polypeptide 1            |
| 8077490 | 6.84 | 5.56 | 2.42 | 2.69E-07 | 0.001111 | LMCD1     | LIM and cysteine-rich domains 1                                   |
| 8116921 | 5.18 | 3.86 | 2.5  | 0.000011 | 0.011903 | EDN1      | endothelin 1                                                      |
| 7992828 | 7.63 | 6.31 | 2.5  | 0.000014 | 0.012790 | IL32      | interleukin 32                                                    |
| 8089464 | 4.94 | 3.61 | 2.52 | 0.000131 | 0.047180 | LOC151760 | putative uncharacterized protein LOC151760                        |
| 8155327 | 8.25 | 6.89 | 2.57 | 0.000020 | 0.014765 | ALDH1B1   | aldehyde dehydrogenase 1 family, member B1                        |



|         |      |      |      |          |          |          |                                                                                   |
|---------|------|------|------|----------|----------|----------|-----------------------------------------------------------------------------------|
| 8157216 | 7.91 | 6.55 | 2.57 | 0.000390 | 0.085542 | UGCG     | UDP-glucose ceramide glucosyltransferase                                          |
| 8138888 | 4.69 | 3.27 | 2.67 | 0.000010 | 0.011903 | PDE1C    | phosphodiesterase 1C, calmodulin-dependent 70kDa                                  |
| 8041447 | 8.68 | 7.22 | 2.75 | 0.000135 | 0.047180 | CRIM1    | cysteine rich transmembrane BMP regulator 1 (chordin-like)                        |
| 7967212 | 5.55 | 4.07 | 2.78 | 0.000031 | 0.018727 | HPD      | 4-hydroxyphenylpyruvate dioxygenase                                               |
| 8062312 | 9.71 | 8.24 | 2.78 | 0.000019 | 0.014465 | MYL9     | myosin light chain 9                                                              |
| 8023497 | 6.59 | 5.1  | 2.81 | 0.000004 | 0.005252 | ATP8B1   | ATPase, aminophospholipid transporter, class I, type 8B, member 1                 |
| 8129937 | 7.98 | 6.48 | 2.83 | 0.000002 | 0.003708 | CITED2   | Cbp/p300-interacting transactivator, with Glu/Asp rich carboxy-terminal domain, 2 |
| 8085138 | 5.02 | 3.52 | 2.83 | 0.001245 | 0.157504 | OXTR     | oxytocin receptor                                                                 |
| 7950307 | 7.55 | 6.05 | 2.84 | 0.000023 | 0.015824 | UCP2     | uncoupling protein 2 (mitochondrial, proton carrier)                              |
| 7934979 | 7.29 | 5.79 | 2.85 | 0.002791 | 0.249865 | ANKRD1   | ankyrin repeat domain 1 (cardiac muscle)                                          |
| 7924996 | 7.48 | 5.94 | 2.9  | 0.000408 | 0.086002 | C1orf198 | chromosome 1 open reading frame 198                                               |
| 8136200 | 8.36 | 6.82 | 2.91 | 8.06E-07 | 0.001805 | CPA4     | carboxypeptidase A4                                                               |
| 8058857 | 4.9  | 3.34 | 2.93 | 0.001411 | 0.165781 | IGFBP5   | insulin like growth factor binding protein 5                                      |
| 7971077 | 8.39 | 6.82 | 2.97 | 0.002010 | 0.210336 | POSTN    | periostin, osteoblast specific factor                                             |
| 7902687 | 9.16 | 7.56 | 3.04 | 0.000049 | 0.025518 | CYR61    | cysteine-rich, angiogenic inducer, 61                                             |
| 7942503 | 9.81 | 8.12 | 3.21 | 6.02E-07 | 0.001458 | PPME1    | protein phosphatase methylesterase 1                                              |
| 8112980 | 8.65 | 6.95 | 3.25 | 0.000002 | 0.003708 | EDIL3    | EGF-like repeats and discoidin I-like domains 3                                   |
| 8041422 | 4.33 | 2.56 | 3.41 | 0.000035 | 0.019965 | RASGRP3  | RAS guanyl releasing protein 3 (calcium and DAG-regulated)                        |
| 7923034 | 3.97 | 2.15 | 3.53 | 0.000009 | 0.010646 | B3GALT2  | UDP-Gal:betaGlcNAc beta 1,3-galactosyltransferase 2                               |

|         |       |      |       |          |          |        |                                                |
|---------|-------|------|-------|----------|----------|--------|------------------------------------------------|
| 7914342 | 8.02  | 6.1  | 3.8   | 4.12E-09 | 0.000060 | FABP3  | fatty acid binding protein 3, muscle and heart |
| 8060897 | 7.94  | 6    | 3.83  | 0.001656 | 0.184636 | PLCB4  | phospholipase C, beta 4                        |
| 7909789 | 8.8   | 6.75 | 4.14  | 2.77E-07 | 0.001111 | TGFB2  | transforming growth factor beta 2              |
| 8095986 | 7.29  | 5.04 | 4.78  | 0.000030 | 0.018727 | ANXA3  | annexin A3                                     |
| 8112971 | 6.8   | 3.74 | 8.35  | 0.000044 | 0.023861 | HAPLN1 | hyaluronan and proteoglycan link protein 1     |
| 7944082 | 8.92  | 5.09 | 14.28 | 5.15E-07 | 0.001420 | TAGLN  | transgelin                                     |
| 7934906 | 10.82 | 6.86 | 15.56 | 1.59E-09 | 0.000046 | ACTA2  | actin, alpha 2, smooth muscle, aorta           |

**Supplementary Table S2: List of transcript cluster IDs significantly downregulated in *hPheo1* by *siNRAS* treatment (comparison: *siNRAS* versus control-transfected *hPheo1*; ANOVA  $p < 0.05$ , FDR  $< 0.25$ , fold change  $< -1.5$  or  $> 1.5$ ).**

| Transcript Cluster ID | siRNA Average Signal (log2) | Control Average Signal (log2) | Fold Change | ANOVA p-value | FDR p-value | Gene Symbol | Description                                                                                    |
|-----------------------|-----------------------------|-------------------------------|-------------|---------------|-------------|-------------|------------------------------------------------------------------------------------------------|
| 8117594               | 7.55                        | 8.91                          | -2.57       | 0.000919      | 0.127413    | HIST1H2BM   | histone cluster 1, H2bm                                                                        |
| 8015806               | 5.76                        | 7.11                          | -2.56       | 0.000198      | 0.064016    | ETV4        | ets variant 4                                                                                  |
| 8152617               | 4.59                        | 5.87                          | -2.44       | 0.000659      | 0.111123    | HAS2        | hyaluronan synthase 2                                                                          |
| 7918813               | 6.6                         | 7.87                          | -2.4        | 0.000484      | 0.092620    | CSDE1; NRAS | cold shock domain containing E1, RNA binding; neuroblastoma RAS viral (v-ras) oncogene homolog |
| 8105267               | 5.91                        | 7.14                          | -2.36       | 0.000377      | 0.084364    | ITGA2       | integrin, alpha 2 (CD49B, alpha 2 subunit of VLA-2 receptor)                                   |
| 7966089               | 6.35                        | 7.51                          | -2.24       | 0.000878      | 0.125060    | CMKLR1      | chemerin chemokine-like receptor 1                                                             |
| 8149825               | 5.92                        | 7.08                          | -2.23       | 0.000346      | 0.081128    | STC1        | stanniocalcin 1                                                                                |
| 8092578               | 5.75                        | 6.9                           | -2.21       | 0.000333      | 0.081128    | ETV5; DGKG  | ets variant 5; diacylglycerol kinase gamma                                                     |
| 8138289               | 5.87                        | 7                             | -2.18       | 0.002280      | 0.227965    | ETV1        | ets variant 1                                                                                  |
| 7965040               | 6.91                        | 8.02                          | -2.16       | 0.000670      | 0.112089    | PHLDA1      | pleckstrin homology-like domain, family A, member 1                                            |
| 8150076               | 5.21                        | 6.31                          | -2.15       | 0.000206      | 0.065106    | DUSP4       | dual specificity phosphatase 4                                                                 |
| 8084880               | 4.77                        | 5.77                          | -2          | 0.000008      | 0.010200    | HES1        | hes family bHLH transcription factor 1                                                         |
| 7956867               | 5.39                        | 6.38                          | -1.99       | 0.002583      | 0.245587    | HMGA2       | high mobility group AT-hook 2                                                                  |
| 8102200               | 3.87                        | 4.84                          | -1.96       | 0.001303      | 0.161346    | DKK2        | dickkopf WNT signaling pathway inhibitor 2                                                     |
| 7939341               | 8.7                         | 9.66                          | -1.95       | 0.000066      | 0.030938    | CD44        | CD44 molecule (Indian blood group)                                                             |
| 7909441               | 6.95                        | 7.92                          | -1.95       | 0.001698      | 0.187107    | G0S2        | G0/G1 switch 2                                                                                 |
| 8162216               | 5.5                         | 6.44                          | -1.93       | 0.000017      | 0.013804    | SHC3        | SHC (Src homology 2 domain containing) transforming protein 3                                  |
| 8117395               | 7.75                        | 8.66                          | -1.88       | 0.001306      | 0.161346    | HIST1H2BF   | histone cluster 1, H2bf                                                                        |
| 8120967               | 8.1                         | 9                             | -1.87       | 0.002728      | 0.249682    | NT5E        | 5-nucleotidase, ecto (CD73)                                                                    |
| 7933872               | 5.08                        | 5.97                          | -1.86       | 0.000750      | 0.117378    | EGR2        | early growth response 2                                                                        |

|         |      |       |       |              |              |                                                   |                                                                                                                         |
|---------|------|-------|-------|--------------|--------------|---------------------------------------------------|-------------------------------------------------------------------------------------------------------------------------|
| 8116418 | 5.54 | 6.43  | -1.85 | 0.00115<br>1 | 0.15008<br>5 | GFPT2                                             | glutamine-fructose-6-phosphate transaminase 2                                                                           |
| 7954090 | 8.06 | 8.91  | -1.81 | 0.00116<br>1 | 0.15008<br>5 | EMP1                                              | epithelial membrane protein 1                                                                                           |
| 8124416 | 9.13 | 9.96  | -1.77 | 0.00109<br>0 | 0.14479<br>9 | HIST1H3D;<br>HIST1H2AD                            | histone cluster 1, H3d;<br>histone cluster 1, H2ad                                                                      |
| 8111101 | 6.25 | 7.06  | -1.76 | 0.00078<br>4 | 0.12009<br>9 | ANKH                                              | ANKH inorganic pyrophosphate transport regulator                                                                        |
| 8163618 | 3.81 | 4.61  | -1.75 | 3.11E-08     | 0.00022<br>6 | TNFSF15                                           | tumor necrosis factor (ligand) superfamily, member 15                                                                   |
| 8117389 | 2.64 | 3.43  | -1.73 | 0.00102<br>5 | 0.13877<br>5 | HIST1H2BE                                         | histone cluster 1, H2be                                                                                                 |
| 7976567 | 4.56 | 5.33  | -1.71 | 0.00070<br>5 | 0.11407<br>5 | BDKRB1                                            | bradykinin receptor B1                                                                                                  |
| 8044499 | 7.81 | 8.58  | -1.7  | 0.00054<br>7 | 0.10132<br>9 | SLC20A1                                           | solute carrier family 20 (phosphate transporter), member 1                                                              |
| 8180308 | 9.38 | 10.13 | -1.69 | 0.00241<br>5 | 0.23824<br>2 |                                                   |                                                                                                                         |
| 8180307 | 9.36 | 10.12 | -1.69 | 0.00189<br>4 | 0.19894<br>7 |                                                   |                                                                                                                         |
| 8095728 | 4.51 | 5.25  | -1.68 | 0.00042<br>4 | 0.08813<br>8 | EREG                                              | epiregulin                                                                                                              |
| 8084891 | 4.07 | 4.81  | -1.67 | 0.00176<br>2 | 0.19126<br>0 | FAM43A                                            | family with sequence similarity 43, member A                                                                            |
| 8063923 | 3.88 | 4.61  | -1.67 | 0.00250<br>9 | 0.24169<br>8 | SLCO4A1                                           | solute carrier organic anion transporter family, member 4A1                                                             |
| 8140113 | 4.74 | 5.48  | -1.67 | 0.00185<br>8 | 0.19655<br>4 | STX1A                                             | syntaxin 1A (brain)                                                                                                     |
| 8124524 | 6.3  | 7.03  | -1.65 | 0.00278<br>0 | 0.24968<br>2 | HIST1H2AK                                         | histone cluster 1, H2ak                                                                                                 |
| 8162940 | 4.3  | 5.01  | -1.64 | 0.00057<br>7 | 0.10359<br>2 | ABCA1                                             | ATP binding cassette subfamily A member 1                                                                               |
| 8108873 | 5.09 | 5.8   | -1.64 | 0.00007<br>4 | 0.03310<br>5 | ARHGAP26                                          | Rho GTPase activating protein 26                                                                                        |
| 8178435 | 9.54 | 10.25 | -1.63 | 0.00015<br>5 | 0.05199<br>1 | IER3                                              | immediate early response 3                                                                                              |
| 8142345 | 6.24 | 6.93  | -1.62 | 0.00266<br>6 | 0.24880<br>2 | DOCK4                                             | dedicator of cytokinesis 4                                                                                              |
| 8124437 | 7.98 | 8.68  | -1.62 | 0.00033<br>9 | 0.08112<br>8 | HIST1H3F                                          | histone cluster 1, H3f                                                                                                  |
| 8124534 | 8.7  | 9.39  | -1.62 | 0.00078<br>1 | 0.12009<br>9 | HIST1H4L                                          | histone cluster 1, H4l                                                                                                  |
| 8124380 | 8.62 | 9.31  | -1.61 | 0.00044<br>3 | 0.08949<br>1 | HIST1H1A                                          | histone cluster 1, H1a                                                                                                  |
| 7942123 | 6.27 | 6.95  | -1.6  | 0.00010<br>7 | 0.04177<br>6 | CCND1                                             | cyclin D1                                                                                                               |
| 8040238 | 6.84 | 7.51  | -1.6  | 0.00004<br>4 | 0.02386<br>1 | HPCAL1                                            | hippocalcin-like 1                                                                                                      |
| 7949364 | 5.79 | 6.44  | -1.57 | 0.00108<br>3 | 0.14448<br>2 | CDCA5                                             | cell division cycle associated 5                                                                                        |
| 7898161 | 6.99 | 7.64  | -1.56 | 0.00073<br>6 | 0.11593<br>5 | EFHD2                                             | EF-hand domain family member D2                                                                                         |
| 7919612 | 9.75 | 10.39 | -1.56 | 0.00214<br>6 | 0.22216<br>3 | HIST2H3A;<br>HIST2H3D;<br>HIST2H3C;<br>HIST2H3PS2 | histone cluster 2, H3a;<br>histone cluster 2, H3d;<br>histone cluster 2, H3c;<br>histone cluster 2, H3,<br>pseudogene 2 |
| 7950473 | 6.73 | 7.36  | -1.55 | 0.00135<br>5 | 0.16422<br>7 | ARRB1                                             | arrestin, beta 1                                                                                                        |

|         |      |      |       |              |              |       |                                       |
|---------|------|------|-------|--------------|--------------|-------|---------------------------------------|
| 8179704 | 9.34 | 9.97 | -1.55 | 0.00006<br>0 | 0.02876<br>4 | IER3  | immediate early<br>response 3         |
| 8124848 | 9.34 | 9.97 | -1.55 | 0.00006<br>0 | 0.02876<br>4 | IER3  | immediate early<br>response 3         |
| 8180321 | 8.24 | 8.87 | -1.55 | 0.00057<br>2 | 0.10334<br>7 |       |                                       |
| 8180255 | 8.24 | 8.87 | -1.55 | 0.00057<br>2 | 0.10334<br>7 |       |                                       |
| 7967117 | 4.78 | 5.4  | -1.53 | 0.00008<br>9 | 0.03747<br>4 | OASL  | 2-5-oligoadenylate<br>synthetase-like |
| 8017599 | 4.43 | 5.04 | -1.53 | 0.00000<br>1 | 0.00230<br>0 |       |                                       |
| 8115664 | 2.82 | 3.43 | -1.53 | 0.00087<br>4 | 0.12506<br>0 |       |                                       |
| 7963545 | 4.06 | 4.66 | -1.52 | 0.00135<br>4 | 0.16422<br>7 | KRT79 | keratin 79, type II                   |
| 8166580 | 7.23 | 7.84 | -1.52 | 0.00085<br>7 | 0.12435<br>4 |       |                                       |

**Supplementary Table S3: Genes up- and downregulated by siNRAS-treatment of hPheo1.**

Alphabetical list of genes significantly up- and downregulated in hPheo1 by siNRAS-treatment (ANOVA  $p < 0.05$ , FDR  $< 0.25$ , fold change  $< -1.5$  or  $> 1.5$ ) and mapped in MSigDB, which were included in gene set overlap analyses.

| <b>siNRAS hPheo1</b> | <b>Genes</b>                                                                                                                                                                                                                                                                                                                                                                                                                                                                                                                                                                                                                                                                                                                                                                                                                                                        |
|----------------------|---------------------------------------------------------------------------------------------------------------------------------------------------------------------------------------------------------------------------------------------------------------------------------------------------------------------------------------------------------------------------------------------------------------------------------------------------------------------------------------------------------------------------------------------------------------------------------------------------------------------------------------------------------------------------------------------------------------------------------------------------------------------------------------------------------------------------------------------------------------------|
| <b>Upregulated</b>   | <i>ABHD4, ACTA2, ALDH1B1, ALPK2, ANKRD1, ANXA3, ARID5B, ATP8B1, B3GALT2, C1orf198, C7orf69, C9, CAP2, CCDC80, CITED2, COL12A1, CPA4, CPE, CPEB2, CRABP2, CRIM1, CSRP1, CYP17A1, CYR61, DAGLB, DDAH1, EDIL3, EDN1, ERCC2, F2RL2, FABP3, FABP3P2, FADS3, FAM13C, FAM198B, FAT4, FBXL2, FHDC1, FILIP1L, FOLR1, FSTL1, FSTL3, GAS6, GCNT1, GLIPR2, GPRC5A, HAPLN1, HLA-DMA, HLA-DMB, HPD, IFI30, IGFBP5, IL32, KDELR2, KDM5B, KLF7, KRT80, LAYN, LBH, LMCD1, LOC151760, LRIG3, MAMDC2, MAP1LC3C, MFSD6, MSRB3, MYL6, MYL6B, MYL9, NDUFC1, NEDD9, OXTR, PALLD, PCDHB5, PDE1C, PELI1, PIK3R3, PLAC1, PLCB4, POSTN, PPME1, PPP1R3C, PRICKLE1, PTPN21, RAB11FIP1, RASGRP3, RBM24, RHOB, RHOBTB1, SLC12A8, SLC16A4, SORT1, SPARC, STARD5, STK38, SYNC, TAGLN, TDRKH, TGFB2, THRSP, THY1, TLE4, TMEM130, TNFRSF9, TP53INP1, TPM1, TRAM2, TUFT1, UCP2, UGCG, YPEL2, ZDHHC9</i> |
| <b>Downregulated</b> | <i>ABCA1, ANKH, ARHGAP26, ARRB1, BDKRB1, CCND1, CD44, CDCA5, CMKLR1, DKK2, DOCK4, DUSP4, EFHD2, EGR2, EMP1, EREG, ETV1, ETV4, ETV5, FAM43A, G0S2, GFPT2, HAS2, HES1, HIST1H1A, HIST1H2AK, HIST1H2BE, HIST1H2BF, HIST1H2BM, HIST1H3D, HIST1H3F, HIST1H4L, HIST2H3A, HMGA2, HPCAL1, IER3, ITGA2, KRT79, NT5E, OASL, PHLDA1, SHC3, SLC20A1, SLC04A1, STC1, STX1A, TNFSF15</i>                                                                                                                                                                                                                                                                                                                                                                                                                                                                                          |

**Supplementary Table S4: Differentially expressed genes in RTK1 and RTK3 PPGL**

**subclusters.** Alphabetical list of genes significantly differentially expressed in RTK1 vs RTK3 clusters of PPGL in the Scandinavian (ANOVA  $p < 0.05$ , FDR  $< 0.25$ , fold change  $< -2$  or  $> 2$ ) and TCGA cohorts (student's T-test with Bonferroni correction factor 289 and 27 for under- and overexpressed genes, respectively); and mapped in MSigDB for gene set overlap analysis.

| <b>RTK1 vs RTK3</b>  | <b>Genes</b>                                                                                                                                                                                                                                                                                                                                                                                                                                                                                                                                                                                                                                                                                                                                                                                                                                                                    |
|----------------------|---------------------------------------------------------------------------------------------------------------------------------------------------------------------------------------------------------------------------------------------------------------------------------------------------------------------------------------------------------------------------------------------------------------------------------------------------------------------------------------------------------------------------------------------------------------------------------------------------------------------------------------------------------------------------------------------------------------------------------------------------------------------------------------------------------------------------------------------------------------------------------|
| <b>Downregulated</b> | <i>ACTA2, ANGPTL2, AOC3, ASPN, BST2, CIR, CIS, CAV1, CAV2, CD53, CD68, CD86, CDH13, CFH, CNN1, COL15A1, COL1A2, COL3A1, COL4A1, COL4A2, COL6A3, CXCL10, CYR61, DCN, EDIL3, EFEMP1, EMP1, ENPEP, ENTPD1, EPB41L4A, EPS8, EVI2B, FAM26E, FAM69A, FCER1G, FCGR2A, FHL5, FLNA, FMO3, FPR3, FSTL1, FYB, GBP1, GBP2, GBP3, GIMAP4, GPR116, GPX8, HGF, IFI44L, IFITM1, IFITM3, IGHA1, IGHV3-33, IGHV3-74, IGJ, IGKC, IGKV1D-42, IGKV2D-30, IL1R1, IL2RG, ITGA2, ITGA5, ITGB5, JAG1, LAPTM5, LHFP, LTBP1, LUM, LY96, LYVE1, LYZ, MGP, MICAL2, MPZL2, MSR1, MYC, MYOF, NCKAP1L, NEXN, NFIB, OAS2, OLFML2B, OSMR, PDE1A, PDE4B, PDK4, PHACTR2, PITPNC1, PLN, PLS3, POSTN, PPIC, PRRX1, PRSS23, PTPRC, PXDN, SAMD9L, SERPINF1, SLFN11, SPARCL1, SRGN, ST6GAL1, SULF2, TAGLN, TES, TFPI, TGFBI, TGM2, THBS1, THBS2, TNC, TNFAIP3, TNFSF10, TNS1, TRIM22, VAMP8, VCAM1, VCAN, VSIG4, ZYX</i> |
| <b>Upregulated</b>   | <i>PPP1R1B</i>                                                                                                                                                                                                                                                                                                                                                                                                                                                                                                                                                                                                                                                                                                                                                                                                                                                                  |

**Supplementary Table S5: Primer pairs.** Alphabetical list of forward (FP) and reverse (RP) primers used for RT-qPCR and Sanger sequencing (the latter marked with \*). Primer sequences, amplicon lengths, and for RT-qPCR validated cDNA concentration ranges with *GUSB* (G) or *HPRT1* (H) as reference genes, are provided.

| <b>Gene</b>   | <b>Sequence (5'→ 3')</b>                                             | <b>Amplicon length (bp)</b> | <b>Validated concentration range (ng/reaction)</b> |
|---------------|----------------------------------------------------------------------|-----------------------------|----------------------------------------------------|
| <i>ACTA2</i>  | FP:CGGGAGAAAATGACTCAAATTATGTT<br>RP: CATACATGGCTGGGACATTGAA          | 55                          | 0.03-30 (G)                                        |
| <i>ANKRD1</i> | FP: ACATACAAGACTCCTTCAGCCAACA<br>RP: TTTCCAGTGACCAGTTCCTCTACTTT      | 62                          | 0.016-16 (H)                                       |
| <i>CCND1</i>  | FP: GAGGAGCTGCTGCAAATGG<br>RP: CGGCCAGGTTCCACTTGA                    | 58                          | 0.017-17 (G, H)                                    |
| <i>CITED2</i> | FP: CCCGCCCTCGGTCTTC<br>RP: TTCCAGTCCTTCCGTTTTTGC                    | 49                          | 0.016-16 (H)                                       |
| <i>CMKLRI</i> | FP: ATAACGGTGAATGAGAATGGAGGAT<br>RP: ACCGTAAGTATGGAAGTGTGTAAT        | 55                          | 0.016-16 (H)                                       |
| <i>GUSB</i>   | FP: CAAGACAGTGGGCTGGTGAATTA<br>RP: CTTGAACAGGTTACTGCCCTTGAC          | 57                          | n/A                                                |
| <i>HES1</i>   | FP:AGCACAGAAAGTCATCAAAGCCTATTAT<br>RP: ACTTTCATTTATTCTTGCTCTTCGCTCTT | 62                          | 0.0075-7.5 (H)                                     |
| <i>HPRT1</i>  | FP: ATGGACTAATTATGGACAGGACTGAA<br>RP: CTCCCATCTCCTTCATCACATCT        | 60                          | n/A                                                |
| <i>HRAS</i>   | FP: CGGCAGGGAGTGGAGGAT<br>RP: GCTTGTGCTGCCGGATCT                     | 58                          | 0.03-30 (H)                                        |
| <i>NRAS*</i>  | FP: CAAACTGGTGGTGGTTGGAG<br>RP: AGTTCGTGGGCTTGTTTTGT                 | 387                         | n/A                                                |
| <i>NRAS</i>   | FP: GACCAGACAGGGTGTGGAAGATG<br>RP: CATTTCGGTACTGGCGTATTTCTCT         | 64                          | 0.017-17 (H)                                       |
| <i>KIF1B*</i> | FP: CGCACAGTGGTAGCAGTAGA<br>RP: CCATCTCATCTTGCTGCTCG                 | 331                         | n/A                                                |
| <i>TAGLN</i>  | FP: CAAGGAGCTTTCCCCAGACAT<br>RP: GCACTTCGCGGCTCATG                   | 62                          | 0.015-15 (G)                                       |
| <i>TGFB2</i>  | FP: TTCTTCCCCTCCGAAACTGTCT<br>RP: ACTGAGCCAGAGGGTGTGTAAC             | 53                          | 0.016-16 (H)                                       |



**Supplementary Table S6: PCR protocols.** PCR protocol for amplicon in Sanger sequencing and RT-qPCR.

| <b>Sanger sequencing</b>                                                                                                                                                                                                                                 | <b>RT-qPCR</b>                                                                                                                                                          |
|----------------------------------------------------------------------------------------------------------------------------------------------------------------------------------------------------------------------------------------------------------|-------------------------------------------------------------------------------------------------------------------------------------------------------------------------|
| <b>Start:</b> 1 minute, 95 °C<br><b>35 cycles:</b><br>Denaturation: 15 seconds, 95 °C<br>Annealing ( <i>NRAS</i> ): 15 seconds, 57 °C<br>Annealing ( <i>KIF1B</i> ): 15 seconds, 50.5 °C<br>Extension: 45 seconds, 72 °C<br><b>End:</b> 5 minutes, 72 °C | <b>Start:</b> 2 minutes, 50 °C<br>10 minutes, 95 °C<br><b>40 cycles:</b><br>Melting: 15 seconds, 95 °C<br>Annealing: 1 minute, 60 °C<br><b>End:</b> Melt curve analysis |
